# Supplementary material for: Genetic breakdown of a Tet-off conditional lethality system for insect population control
Source: PubMed Central journal article supplement (PMC7303202; doi:10.1038/s41467-020-16807-3), 2020-06-18
Supplement: 41467_2020_16807_MOESM1_ESM.pdf [file 41467_2020_16807_MOESM1_ESM.pdf]

## **Supplementary Information**

### **Genetic breakdown of a Tet-off conditional lethality system for insect population control**

**Zhao et al.**

**Supplementary Tables 1 and 2**

**Supplementary Figures 1 to 7**

**Supplementary Table 1. Effect of dietary tetracycline concentrations on DH-1 survival**

| Strain | Tet concentration<br>(ug/ml) | No.<br>Eggs | No.<br>Pupae | No.<br>Adults | %<br>Eggs:Pupae | %<br>Eggs:Adults |
|--------|------------------------------|-------------|--------------|---------------|-----------------|------------------|
| DH-1   | 0                            | 200         | 0            | 0             | 0               | 0                |
|        | 10                           | 200         | 154          | 154           | 77%             | 77%              |
|        | 50                           | 200         | 162          | 161           | 81%             | 80.5%            |
|        | 100                          | 200         | 110          | 108           | 55%             | 54%              |
| w[m]   | 0                            | 200         | 152          | 151           | 76%             | 75.5%            |

**Supplementary Table 2. Oligonucleotide PCR primer sequences in 5' to 3' orientation**

---

|        |                                  |
|--------|----------------------------------|
| AH1117 | NGTCGASWGANAWGAA                 |
| AH1536 | CGTTATAGTTCAAAATCAGTGACAC        |
| AH1537 | CTCGATATACAGACCGATAAAACAC        |
| AH1540 | GATCTGACAATGTTTCAGTGCAG          |
| AH1542 | CTCTGGACGTCATCTTCACTTAC          |
| AH1543 | CTTTTATTATATACAGCCATAATGTCA      |
| AH1554 | GACACACGCGCAGACTGTC              |
| AH1557 | TATATGAGACGAGAGTAAGGGGTCC        |
| AH1562 | TTCGCCTTTTGTCGTTCTC              |
| AH1565 | TGAACCCGTGTATTTTCGCAT            |
| AH1566 | AGTCTCTGCACTGAACATTGTCAG         |
| AH1570 | GCTTTACATTAGCCGCTCTT             |
| AH1574 | TATCGCACTCTGGACTCTGG             |
| AH1577 | AGTACTGTCATCTGATGTACCAG          |
| AH1579 | ACACTTACATACTAATAATAAATTCAACAAAC |
| AH1581 | CATTGCAATTGGATCCATAT             |
| AH1582 | AGTACTTCTCGAGCTCTGTAC            |
| AH1585 | TATCTGAATTCTTCTTCCGTATT          |
| AH1601 | TCCAGGAACCCAGTAGGTA              |
| AH1610 | GAATGGGCGGTACCTACTA              |
| AH1614 | GTCCAAACTCATCAATGTATCTTA         |
| AH1615 | TCCAAACTCATCAATGTATCAAG          |
| AH1616 | GAATTCGAGTTTACCACTCCCTA          |
| AH1619 | ATGAACTCGACGCTACGTC              |
| AH1631 | ATCGAAATCGTCTAGCGCGT             |
| AH1635 | CTTCAAGATCCGCCACAA               |
| AH1636 | CATGTGATCGCGTTCTC                |
| AH1638 | ACAACCACTACCTGAGCAC              |
| AH1652 | TGCTTGTC AATGCGGTAAGT            |

---

a) Driver integration site: *Tab2*: TAK1-associated binding protein 2 gene on chromosome 2R, locus 56C8/9 (FBgn0086358; Dmel\_CG7417)

TATAACACCAAATTACCCTTTATCTCGCAATATATTAATAAATACAAATCTCTAAAAGACGTC  
ATAAATTAAAACGCGATTTAAATGACGTTTAAAGCGACTTCTAATTTATGTATGTTTATCACGA  
ACTAAAAATTTAATTACTTTATAAATTTTAAAATTCTCAAGATAGTGAGCAATTATGTATGTTT  
**TAA**<5'pBac\_driver\_3'pBac>**TTAA**AGAAAAAATGTTGGAGTTCACAAAATTCGTTT  
GAAAAATGCAGTTTTTATTTACCAAATATGCAAATCAAACGAACTTAAAAGCTGACTTAGAAA  
TCCTTTTGTATATGGGTGAAACTAAATAAATCCTTTTGTATTATGTAAATCACGTTTCGATTGT  
GTGCTTATCCACGCATTAATAACTGCCTTACTCCATGCACAGAGTACAGCTTTTTTTGAATGTC  
ATGCTGATATGACAGAGCTGAAA

b) Effector integration site: *Sema2b*: Semaphorin 2b gene on chromosome 2R, locus 53C4 (FBgn0264273; Dmel\_CG33960)

AAACGTCGCTTGGCCATTNGATGCGGACGTCGATGTGCACACGTTTAAACCCACTGGCAAGTATT  
CACACAAACAGAGCACTCGGAAAAATAAAAGATTGTGCAAGAGATAAGGAATCAAAAATGGGAA  
ATATATATTATCATTTTTGTAAACCTTTGCAATCGCAGACTGTCAATTTTAGTTCCAGGCTGAAA  
TACCTTAAAACATATACAATTCGAAAATGAACTTATTTAGAACATACAAAACACTGAACTATTC  
TATATTAATGTATCTCAATAAACAGCTTAAATGGCTTAAAAAAGATACTCCTCAAAAAGAAAG  
TACTTTTATTTTCGAGTTGTAGAAAGTCTGATAACTAACAAAAGAAGTTAATATGCTCA**TTAA**<  
5'pBac\_effector\_3'pBac>**TTAA**GTACTTTAAAGTATGTTAAGTATGTATCGCTTTAGCT  
TATATTGCACTTTATGTGCTTATTTTCTAGCAGTGTACTTTAGTGAGCAGCACACACTCTGT  
GATAATTTTCTGCTTTGTGCTGTGCCCTGGCTTTGCTCATGGCTCCAGTTCACAACGTCCTGG  
GTCCTGGGCCCTGAGTCTGAGTCCCGAGCTCCGAGTCTGAGCCCCCTAAATGTTTATTGCTT  
CATTCTGTTTCTGTTGCGCAATTTAATCGATGTCTGGCTGCTCGGCTGACTGCG

**Supplementary Figure. 1. *tTA* driver and TRE-*hid*<sup>Ala5</sup> lethal effector vector chromosomal insertion site sequences.**

Line DH-1 (a) *tTA* driver (<5'pBac\_driver\_3'pBac>) and (b) lethal effector (<5'pBac\_effector\_3'pBac>) vector genomic chromosome 2R integration site sequences. TTAA sequences (bold blue) are the canonical duplicated insertion site for the *piggyBac* vector; maroon sequences indicate flanking genomic sequences identified by a FlyBase Blastn alignment to the *D. melanogaster* genome assembly, and black sequences immediately flanking the vector transgene insertions are of unknown origin, but exist in the non-transgenic *w*[m] host strain (and another *white* strain, *w*<sup>1118</sup>), and were not introduced with the transgene vectors.

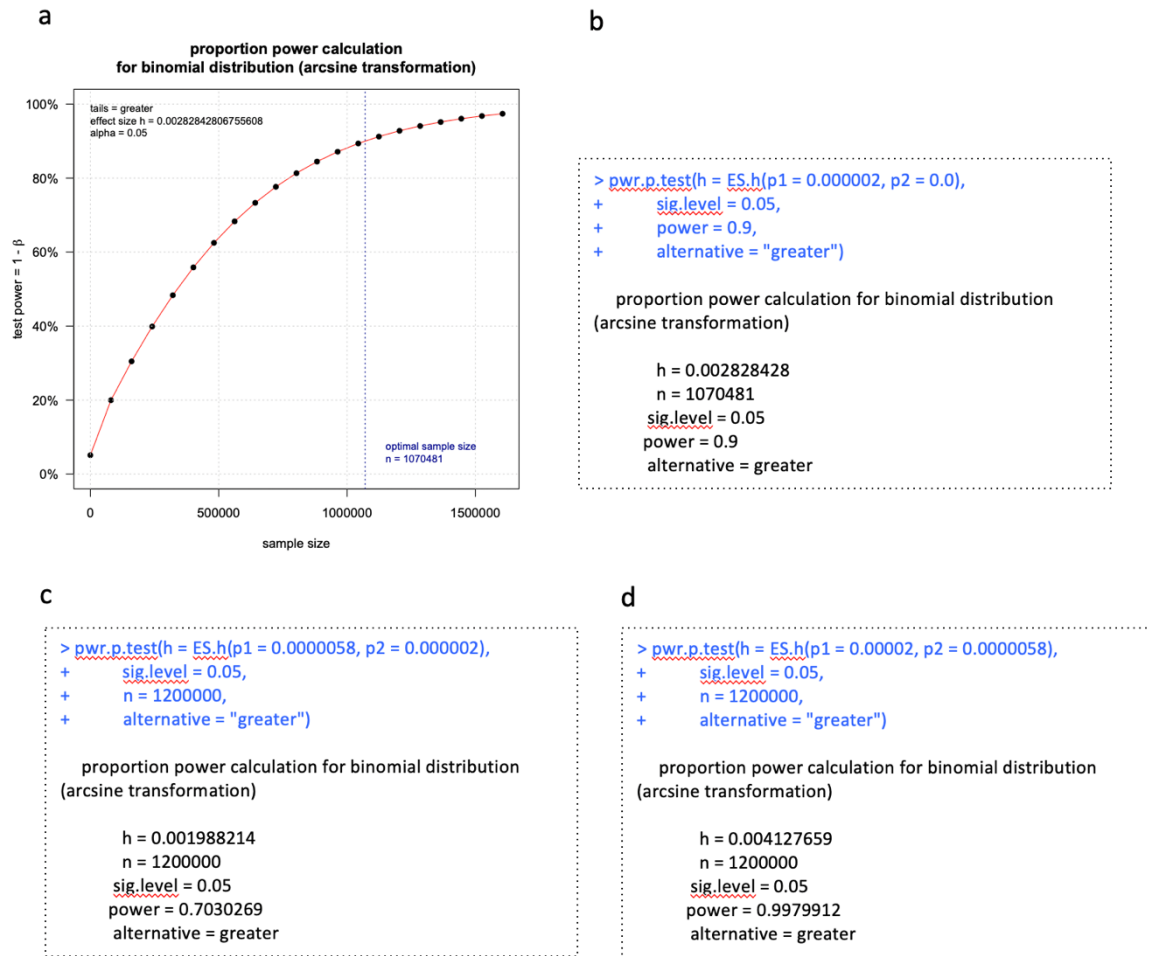

### Supplementary Figure. 2. Power calculation to test for required sample size.

A power calculation using a one-sided Power P-test (`pwr.p.test`) was conducted to test for the required sample size for detecting primary-site genetic alterations based on the typical null mutation rate of  $10^{-6}$  observed in *Drosophila*. If a power of 0.9 at the 0.05 significance level is required, then at least 1,070,481 double-heterozygous  $F_1$  progeny should be screened for detection of primary-site mutations at either each or both loci for the binary lethality system (**a**, **b**). Thus, the actual screened sample size of  $n=1,200,000$  double-heterozygous  $F_1$  progeny, estimated from control experiments, having a power of 0.93 resulted in a high significance level. The estimated frequency of  $5.8 \times 10^{-6}$  for primary-site mutations falls above the null mutation frequency of  $10^{-6}$  and below a  $10^{-5}$  frequency with a power of 0.7 (**c**) and 1.0 (**d**), respectively, at the 0.05 significance level given the screened population size.

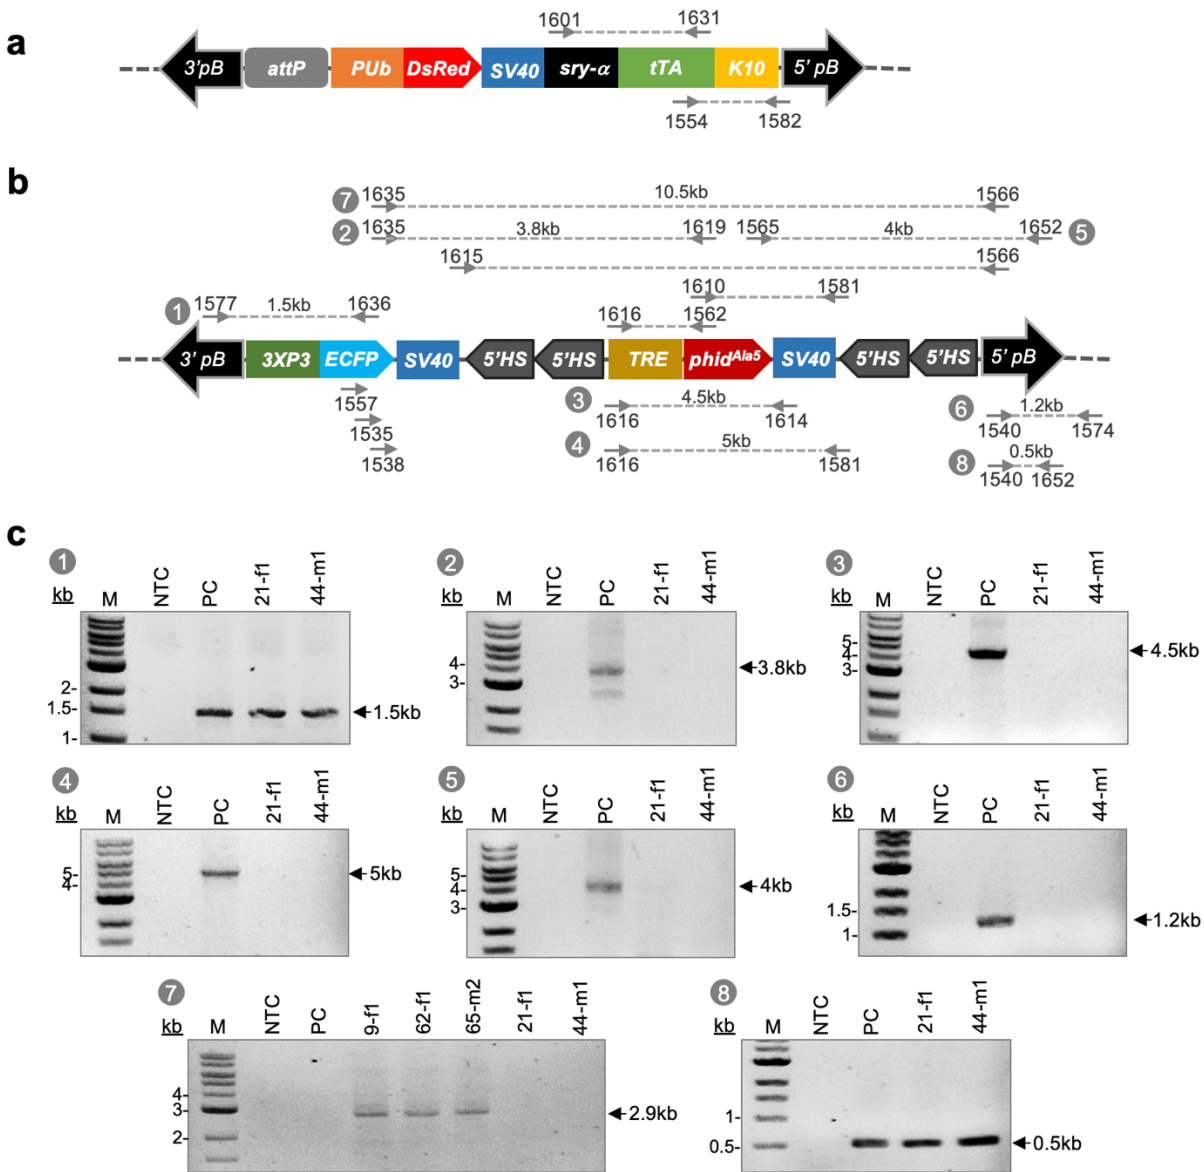

**Supplementary Figure 3. PCR analysis for mutations in the primary-site *tTA* driver and lethal effector cassette sequences.**

Schematic map (not to scale) of the *tTA* driver (**a**) and lethal effector (**b**) vectors with PCR primers and numbered primer sets and their relative positions, and (**c**) corresponding PCR primer set products for the indicated lethal revertant lines. For primer set #7, 2.9 kb PCR products were only recovered in the internally deleted lines and not in the DH-1 control template (PC) due, presumably, to the 10.5 kb expected length and repetitive *5' HS4* sequences. kb, DNA ladder; M, 1 kb markers; NTC, no template control; PC, DH-1 genomic DNA positive control.

|          |                                                              |     |
|----------|--------------------------------------------------------------|-----|
| <b>a</b> |                                                              |     |
| tTA      | TTGTATTGGCATGTAAAAAATAAGCGGGCTTTGCTCGACGCCTTAGCCATTGAGATGTTA | 180 |
| 18f1     | TTGTATTGGCATGTAAAAAATAAGCGGGCTTTGCTCGACGCCTTAGCCATTGAGATGTTA | 420 |
|          | *****                                                        |     |
| tTA      | GATAGGCACCATACTCACTTTTGCCTTTAGAGGGGAAAAGCTGGCAAGATTTTTTACGT  | 240 |
| 18f1     | GATAGGCACCATACTCACTTTTGCCTTTAGAGGGCAAA-----                  | 460 |
|          | ***** **                                                     |     |
| tTA      | AATAACGCTAAAAGTTTtagatgtgctTTACTAAGTCATCGCGATGGAGCAAAAGTACAT | 300 |
| 18f1     | -----AAAAAGTTTtagatgtgctTTACTAAGTCATCGCGATGGAGCAAAAGTACAT    | 513 |
|          | *****                                                        |     |
| <b>b</b> |                                                              |     |
| Hid      | AGGACAAAAAGGAAGCCAGCACACACACACACACCCACACAATGGCCGTGCCCTTTTATT | 420 |
| 45f1     | AGGACAAAAAGGAAGCCAGCACACACACACACACCCACACAATGGCCGTGCCCTTTTATT | 420 |
|          | *****                                                        |     |
| Hid      | TGCCCGAGGGCGGCGCCGATGACGTAGCGTTCGATTCATCGGGAGCCTCGGGCAACTCCT | 480 |
| 45f1     | TGCCCGA-----GTCATCGGGAGCCTCGGGCAACTCCT                       | 454 |
|          | *****                                                        |     |
| Hid      | CCCCCACAACCACCCACTTCCCTCGAGCGCATCCTCGTCCGTCTCCTCCTCGGGCGTGT  | 540 |
| 45f1     | CCCCCACAACCACCCACTTCCCTCGAGCGCATCCTCGTCCGTCTCCTCCTCGGGCGTGT  | 514 |
|          | *****                                                        |     |

**Supplementary Figure. 4. Sequence analysis of primary-site mutations in lines 18-f1 and 45-f1.**

**(a)** A spontaneous 27-bp deletion and 3 nucleotide substitutions within the *tTA* gene in line 18-f1 and **(b)** a spontaneous 26-bp deletion in the *hid*<sup>Ala5</sup> gene in line 45-f1. Asterisks (\*) indicate nucleotide identities, the absence of asterisks indicate nucleotide substitutions (blue) or deletions (maroon), and hyphens (-; maroon) indicate deleted nucleotides with respect to the non-mutated gene sequences above. For 45-f1, the ATG (green) is the translation initiation codon.

a) line 21-f1

5' GTGACCGCCGCGGGATCACTCTCGGCATGGACGAGCTGTACAAGTAAAGCGGCGGCGACTC  
TAGATCATAATCAGCCATACCACATTTGTAGAGGTTTTACTTGCTTTAAAAAACCTCCACACC  
TCCCCCTGAACCTGAAACATAAAATGAATGCAATTGTTGTTGTTAACTTGTTTATTGCAGCTTA  
TAATGGTTACAAATAAAGCAATAGCATCACAAATTTACAAATAAAGCATTTTTTTCACTGCAT  
TCTAGTTGTGGCGATCTTGAAGAAGAATGTGTCTTAAAGCTTATCGATACGCGTACGATCCCCG  
GGTACCCCTAGAGGGACAGCCCCCCCCAAAGCCTTTCGGCAGGTAAGTACTTTTTTCCCTGCA  
TTCGCGGNGGGGCGAGTTAAAAGAGAAAACAATCCGGTCCGGCGCTCCCCACTCATCCCCGA  
3'

b) line 44-m1

5' GGATCACTCTCGGCATGGACGAGCTGTACAAGTAAAGCGGCGGCGACTCTAGATCATAATCA  
GCCATACCACATTTGTAGAGGTTTTACTTGCTTTAAAAAACCTCCACACCTCCCCCTGAACCT  
GAAA AAGGTAAGTACTGCAAGTCCCTGCCGATGCGGCCACGACTGCCGTACCACCACCTGGTTACCCG  
CCAGAGCTAACTTTAAGCCAAGAATTATCGATGAAGCTACGCCATCGGCAAGAACTCCAATCC  
TTACCTACAGAAGAGCGTCTCGAACGACCCCCCATTAACCTAGCTAATAGAGACAATAATTTA  
GAAAAGAAAATTGACATTTTAAATGGCTTTAATCATAACAAGGAAGCAATAACAATAATCTTGACA  
TTGATACATCCATCTAAATTTACATTACACTTATTTGTATATACATCTATTTAACTATATATAT  
CCGCCCCCAAAGCGCACGTCTGTCCAACCTTCATAAATTTCTAATTATCATCACCTTTCTCCACG  
CAAAGCTTAAACCTCCGTTGAAAAACCAATCCATTAGATGGATGACATTTAAAACGTAAATAAAT  
GATCTTCTCACCTCAAGCATCCGGATAAAAAAGGGAAGACGCACTCCAACCTCTGATGAAGCTA  
TGTGAAGAAAACCTACACCAGGATTCAAAAGTC3'

**Supplementary Figure. 5. Sequence analysis of primary-site mutations in lines 18-f1 and 45-f1.**

Partial insert sequences (shaded black) in the lethal effector vector (maroon) from lines 21-f1 (a) and 44-m1 (b) using TAIL-PCR with forward primers in the ECFP gene (see Supplementary Fig. 3).



```

Query 3 GGTACTGCAAGTCCCTGCCGATGCGGCCACGACTGCCGTACCACCACCTGGTTACCCGCC 62
      | | | | | | | | | | | | | | | | | | | | | | | | | | | | | | | | | | | | | | | | | | |
Sbjct 436 GGTACTTCTAATCCCAGCCGAGTCGGCAACGACAGCCCTCCGACCACCAGCAGAGCCGCC 495

Query 63 AGAGCTAACTTTAAGCCAAGAATTATCGATGAAGCTACGCCATCGGCAAGAACTCCAAT 122
      | | | | | | | | | | | | | | | | | | | | | | | | | | | | | | | | | | | | | | | | | | |
Sbjct 496 AGAGCTAAATTTAAGCCAAGAATTATCGATGAAGATACGCCATCGCCAAGAACTCCAAT 555

Query 123 CCTTACCTACAGAAGAGCGTCTCGAACGAcCCCCcCATTAACTAGCTAATAGAGACAAT 182
      | | | | | | | | | | | | | | | | | | | | | | | | | | | | | | | | | | | | | | | | | | |
Sbjct 556 CCTTACCTACAGAAGAGCTTCTCGGACGACCCACCATTAACTAGCTAATAGAGTCGAC 615

Query 183 AATTTAGAAAAGAAAATTGACATTTAATGGCTTTAATCATAAAGGAAGCAATAACAAT 242
      | | | | | | | | | | | | | | | | | | | | | | | | | | | | | | | | | | | | | | | | | | |
Sbjct 616 AATTTAGAAAAGAAAATTGACATTTAATGGCGTTAATCATAAAGGAAGGAACAATAAT 675

Query 243 AATCTTGACATTGATACATCCATCTAAATTTACATT 278
      | | | | | | | | | | | | | | | | | | | | | | | | | | | | | | | | | | | | | | | | | | |
Sbjct 676 A--C-TGACATGGATACTTCAACCTAAATCTACATT 708

```

**Supplementary Figure. 6. Blast alignment of the insert sequence in primary-site line 44-m1.** Blastn analysis to the NCBI *D. melanogaster* genome database for the line 44-m1 partial insert sequence (Query; see Supplementary Fig. 5B) showing alignment to the *D. melanogaster* HeT DNA sequence (Sbjct) (GenBank ID: [M81595.1](#)). Length: 2,837; Identities 239/276 (87%).

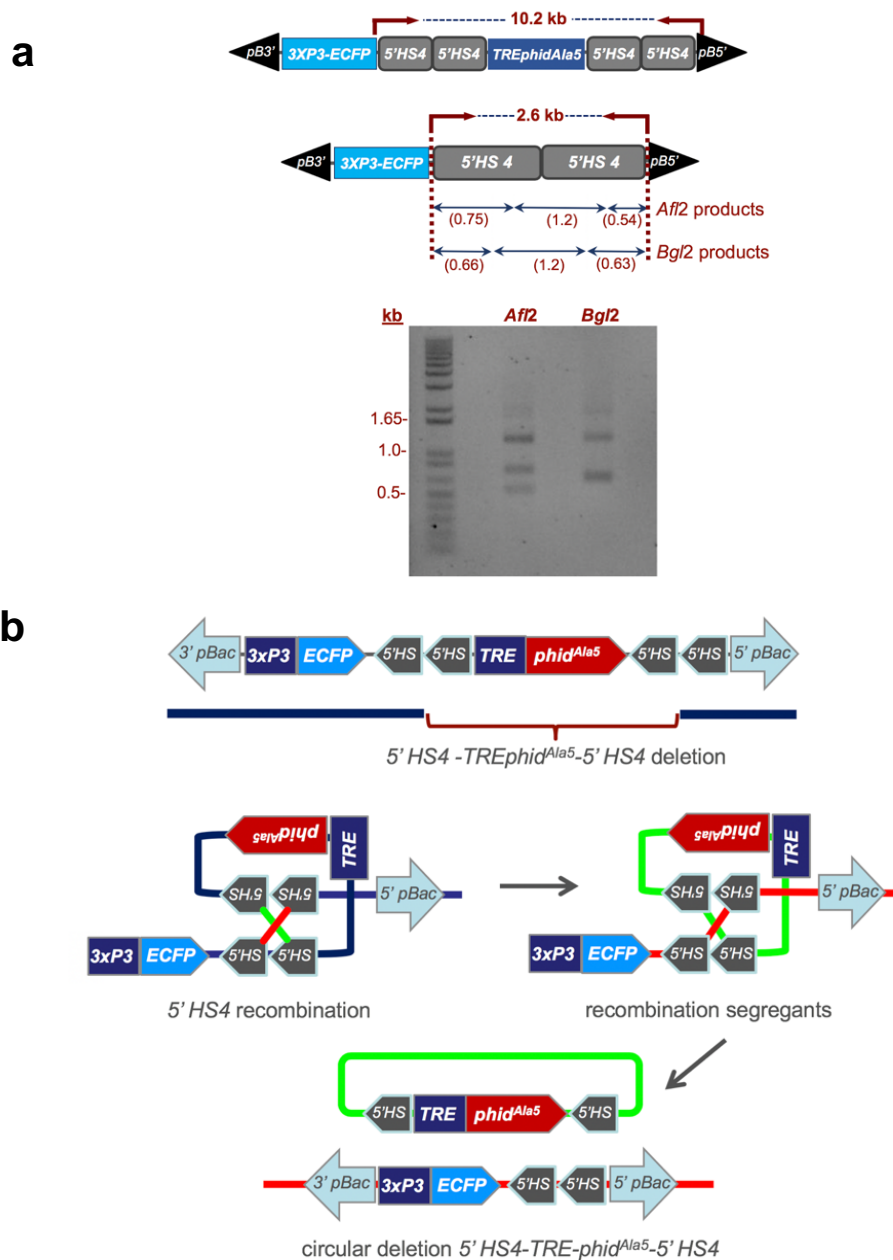

**Supplementary Figure. 7. Restriction digest analysis and proposed mechanism for the same internal lethal effector deletion in primary-site lines 9-f1, 62-f1, and 65-m2.**

**(a)** Confirmation of remaining duplicate 5'HS4 insulator sequences in revertant lines 9-f1, 62-f1, and 65-m2 based on *Afl*III and *Bgl*III restriction digest fragments from a 2.6-kb PCR product using primers for *ECFP*-linked *SV40* and *pB5'* (AH1615-AH1566) (see Supplementary Table 2 and Supplementary Fig. 3). The digest pattern observed in all three lines is consistent with a 5'HS4\_TRE<sup>phid<sup>Ala5</sup></sup>\_5'HS4 sequence deletion from the lethal effector vector. **(b)** Proposed mechanism for the 5'HS4\_TRE<sup>phid<sup>Ala5</sup></sup>\_5'HS4 sequence deletion in the lethal effector vector in lethal revertant lines 9-f1, 62-f1, and 65-m2, by a single *cis*-recombination between paired 5'HS4 insulator sequences within an inverted loop resulting in a circular deletion.
